# Supplementary figures and images for: Regression of Lung Cancer in Mice by Intranasal Administration of SARS-CoV-2 Spike S1
Source: MDPI journal article supplement (doi:10.3390/cancers14225648), 2022-11-17

**2C****BAD**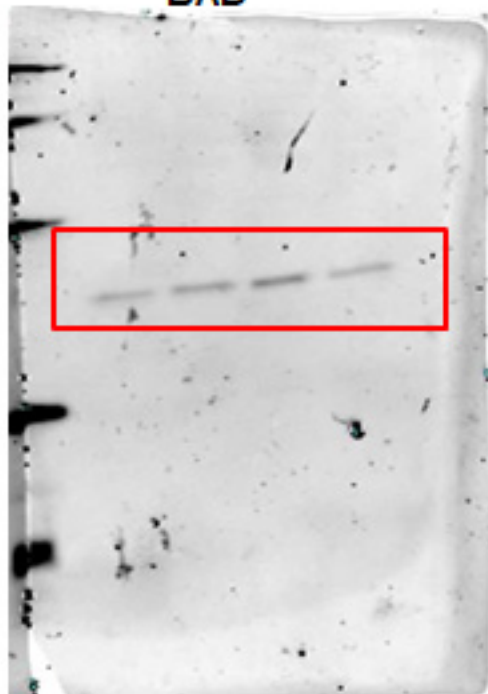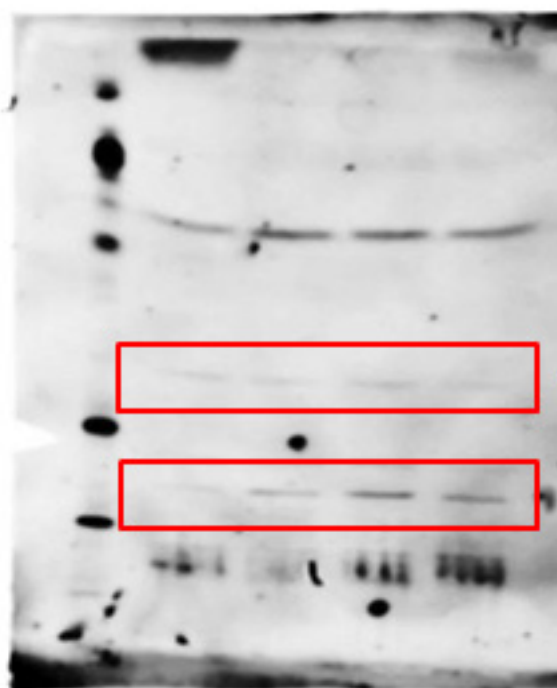**Caspase 3****Cleaved  
caspase 3****Actin**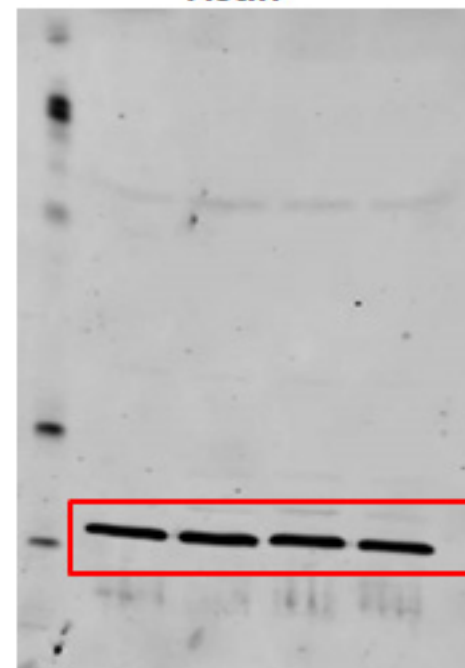**2G****Bcl2**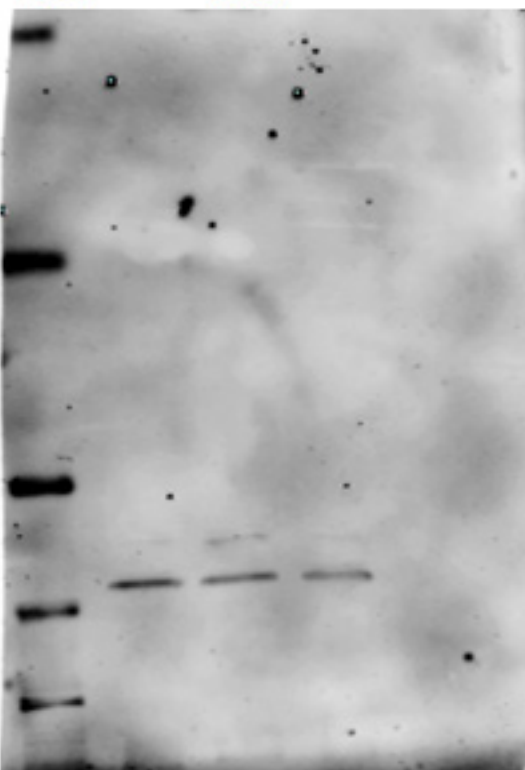**Actin**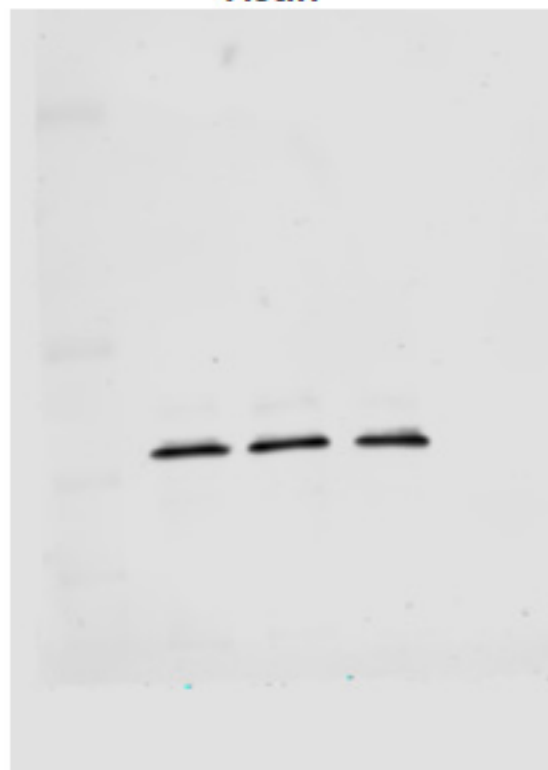

**Figure S1. Raw Western blots for Figure 3C & 3G.**

Supplement: s1 [file s1]
